# Supplementary material for: Structural Determination of Antioxidant and Anticancer Flavonoid Rutin in Solution through DFT Calculations of 1H NMR Chemical Shifts
Source: PubMed Central journal article supplement — ChemistryOpen. 2018 Nov 14;7(11):902–13. doi: 10.1002/open.201800209 (PMC6234759; doi:10.1002/open.201800209), 2018-11-14
Supplement: OPEN-7-902-s001.pdf [file OPEN-7-902-s001.pdf]

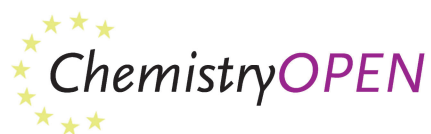

## Supporting Information

© 2018 The Authors. Published by Wiley-VCH Verlag GmbH & Co. KGaA, Weinheim

### **Structural Determination of Antioxidant and Anticancer Flavonoid Rutin in Solution through DFT Calculations of $^1\text{H}$ NMR Chemical Shifts**

Leonardo A. De Souza, Haroldo C. Da Silva, and Wagner B. De Almeida<sup>\*[a]</sup>

open\_201800209\_sm\_miscellaneous\_information.pdf

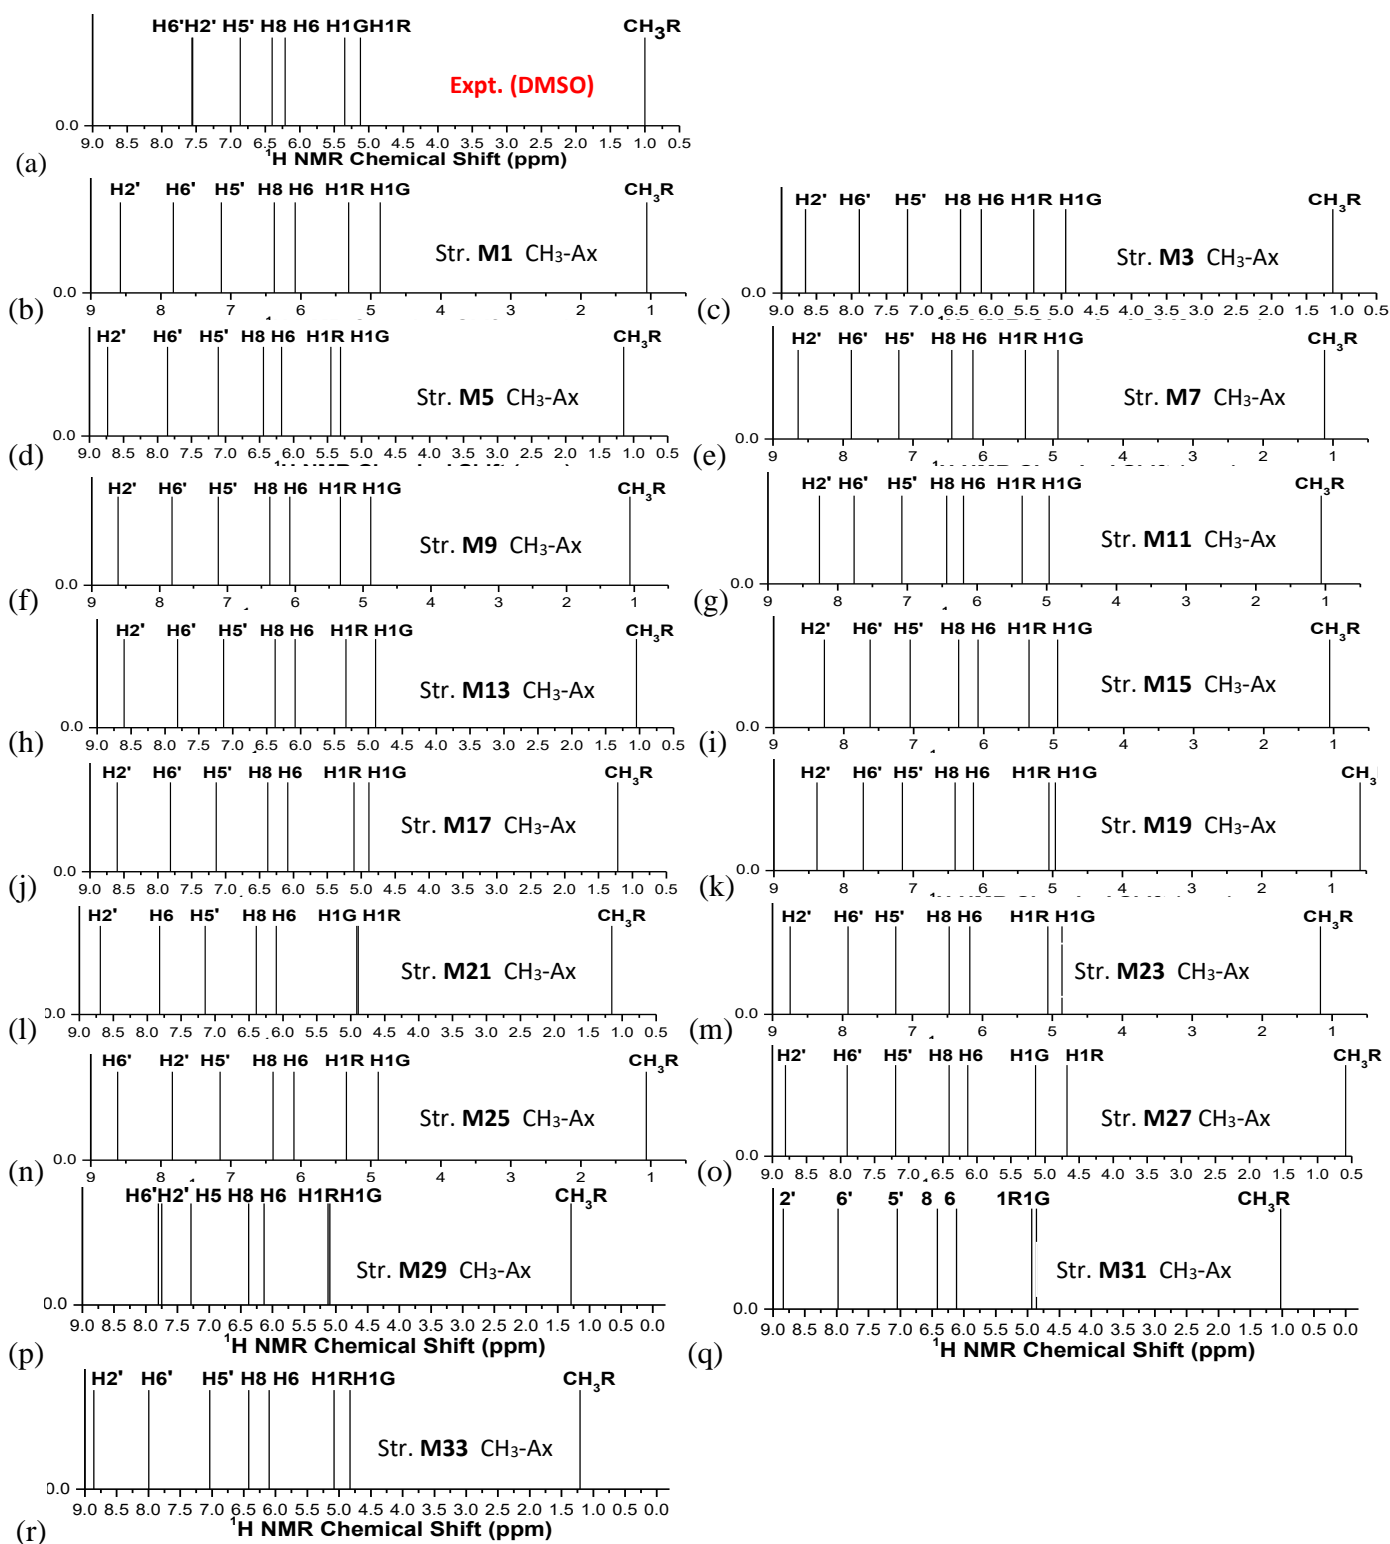

**Figure S1.** Experimental  $^1\text{H}$  NMR spectrum (in  $\text{DMSO-}d_6$ ) from ref. [46] (a) and B3LYP/6-31G(d,p)-PCM(DMSO) (b-r)  $^1\text{H}$  NMR spectra for 17 Rutin optimized structures with the  $\text{CH}_3\text{-C5}''$  group in axial position.

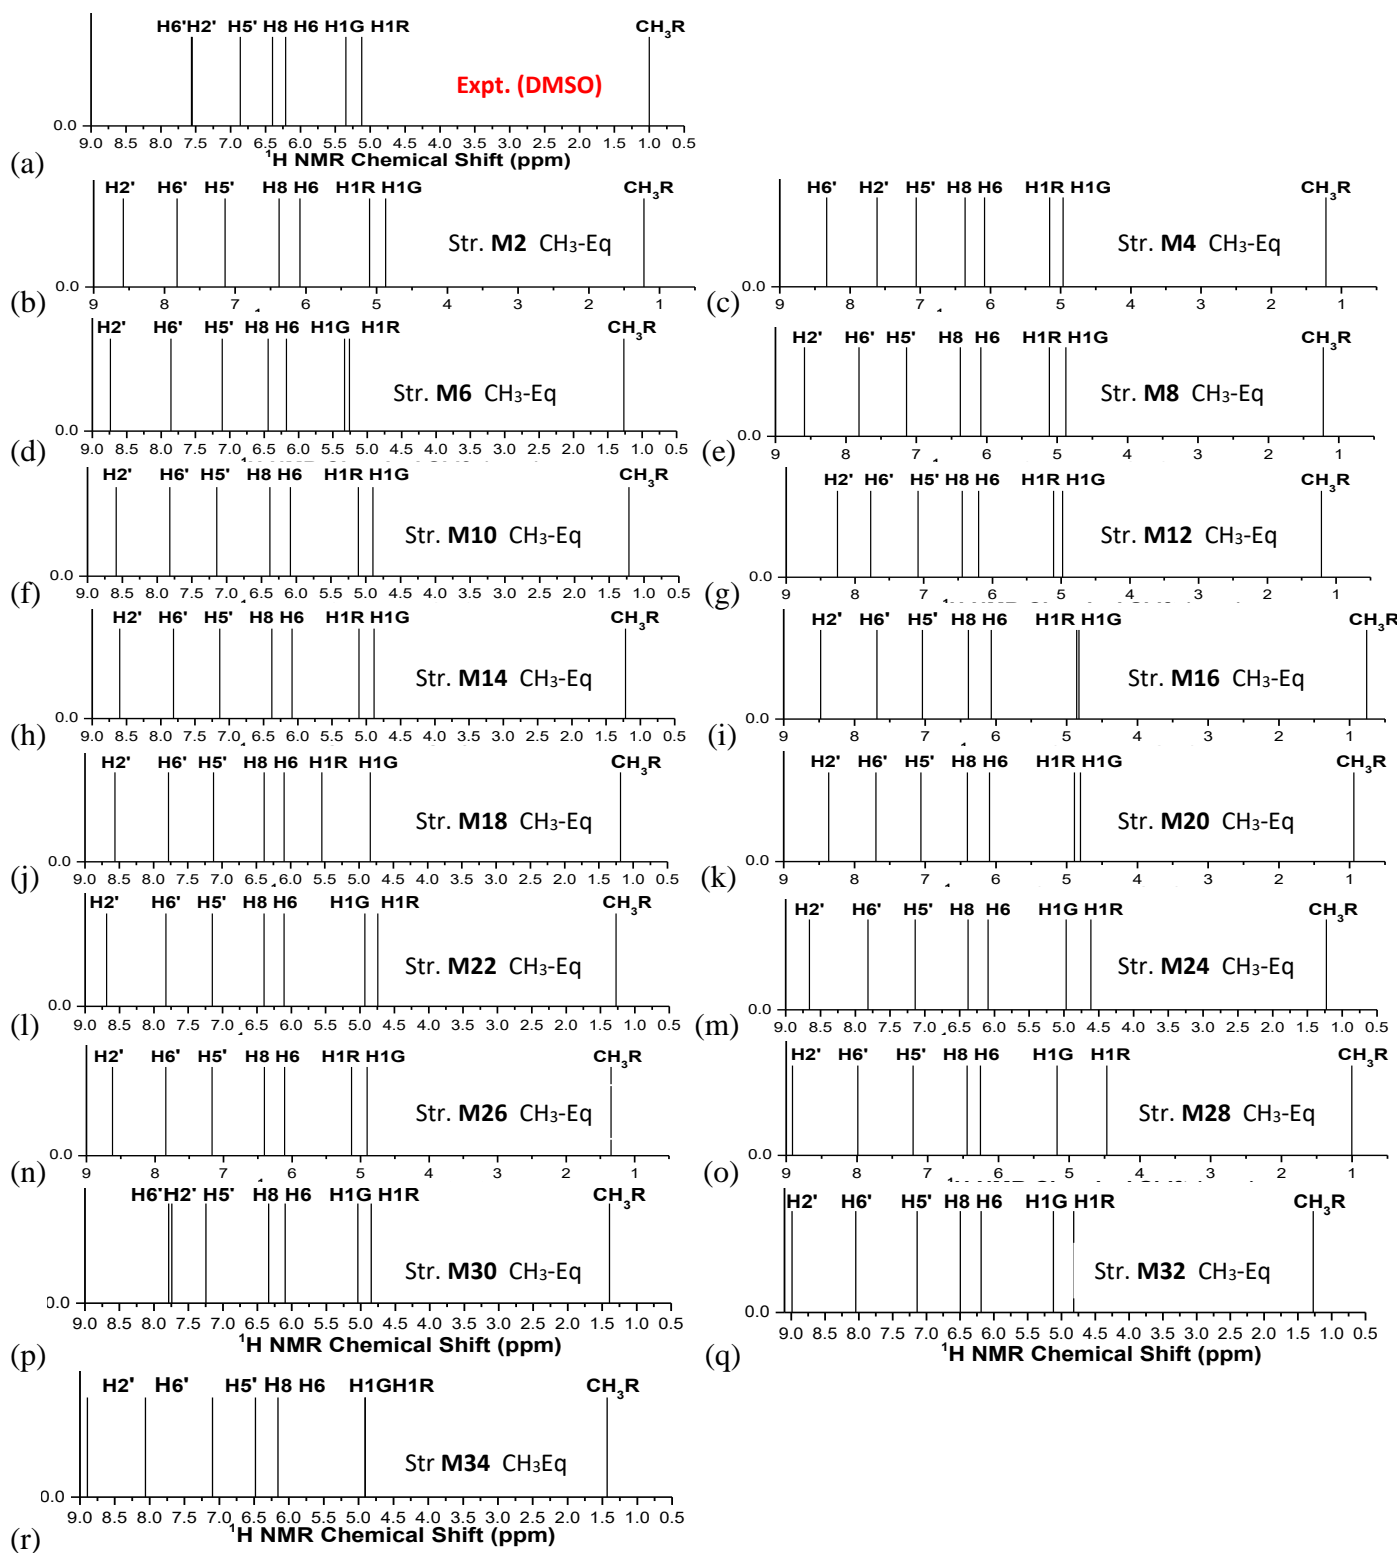

**Figure S2.** Experimental <sup>1</sup>H NMR spectrum (in DMSO-*d*<sub>6</sub>) from ref. [46] (a) and B3LYP/6-31G(d,p)-PCM(DMSO) (b-r) <sup>1</sup>H NMR spectra for 17 rutin optimized structures with the CH<sub>3</sub>-C5'' group in equatorial position.

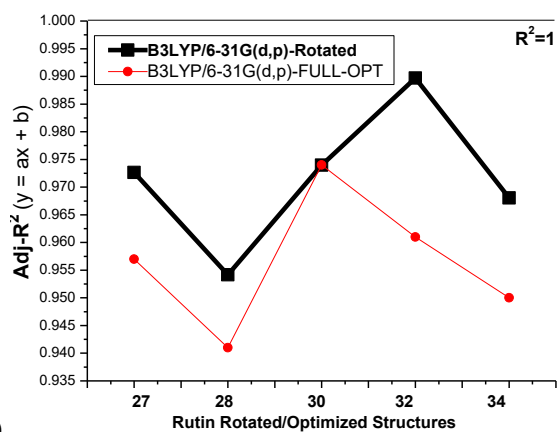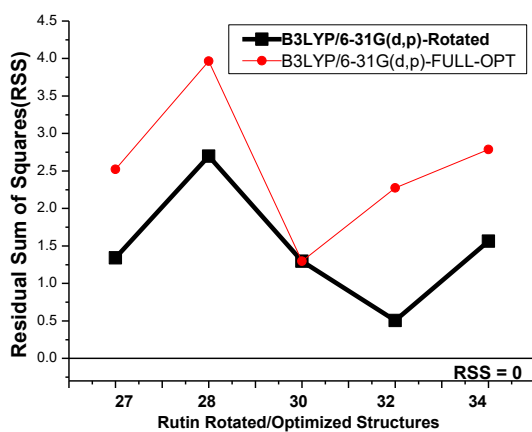

(a) (b)

**Figure S3.** B3LYP/6-31G(d,p)-PCM(DMSO)  $^1\text{H}$  NMR chemical shifts (in ppm) regression analysis for rutin molecule. Rotated and Fully-optimized almost planar (FULL-OPT) structures.

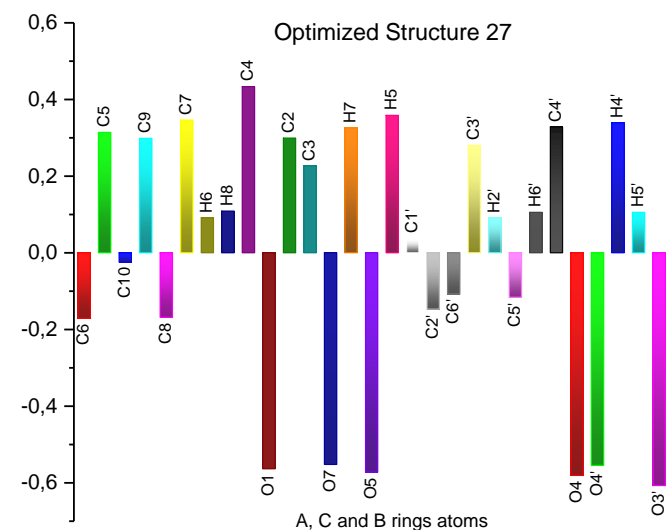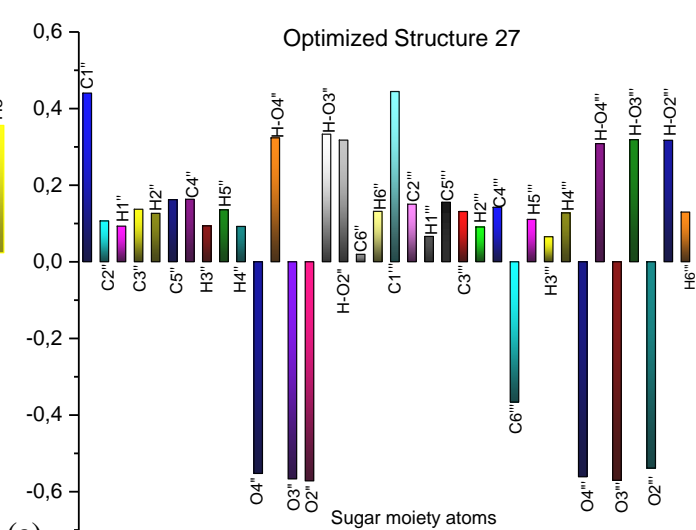

(a)

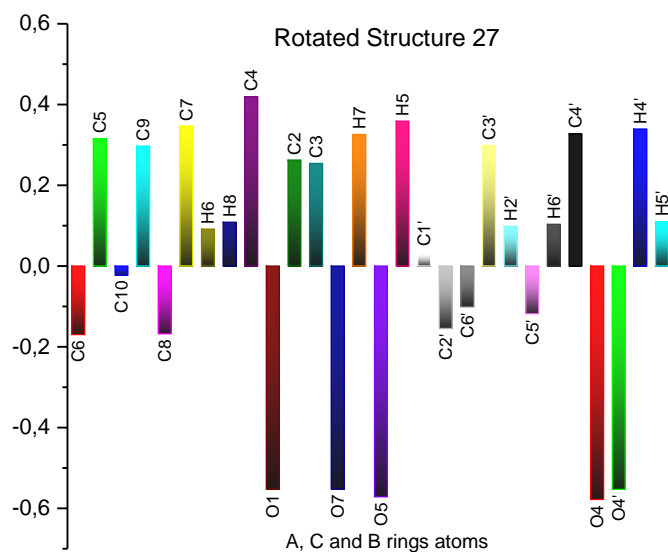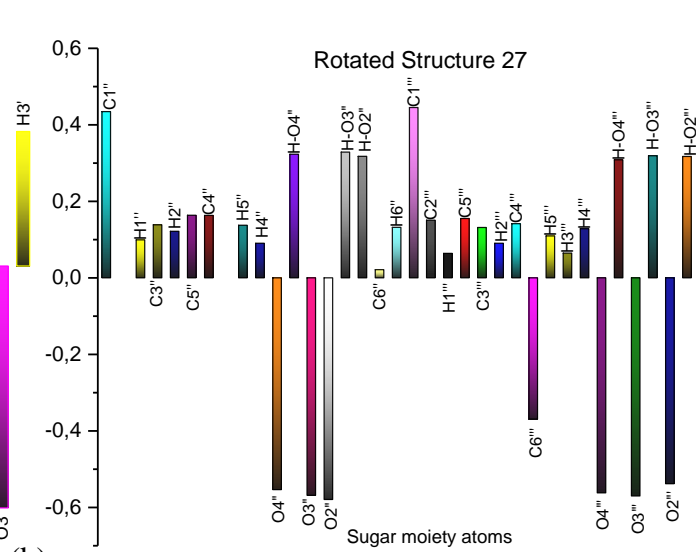

(b)

**Figure S4.1** Comparison of B3LYP/6-31G(d,p) Mulliken charges for all atoms of the optimized and rotated structure **27** of the rutin molecule showed in Figure 6.

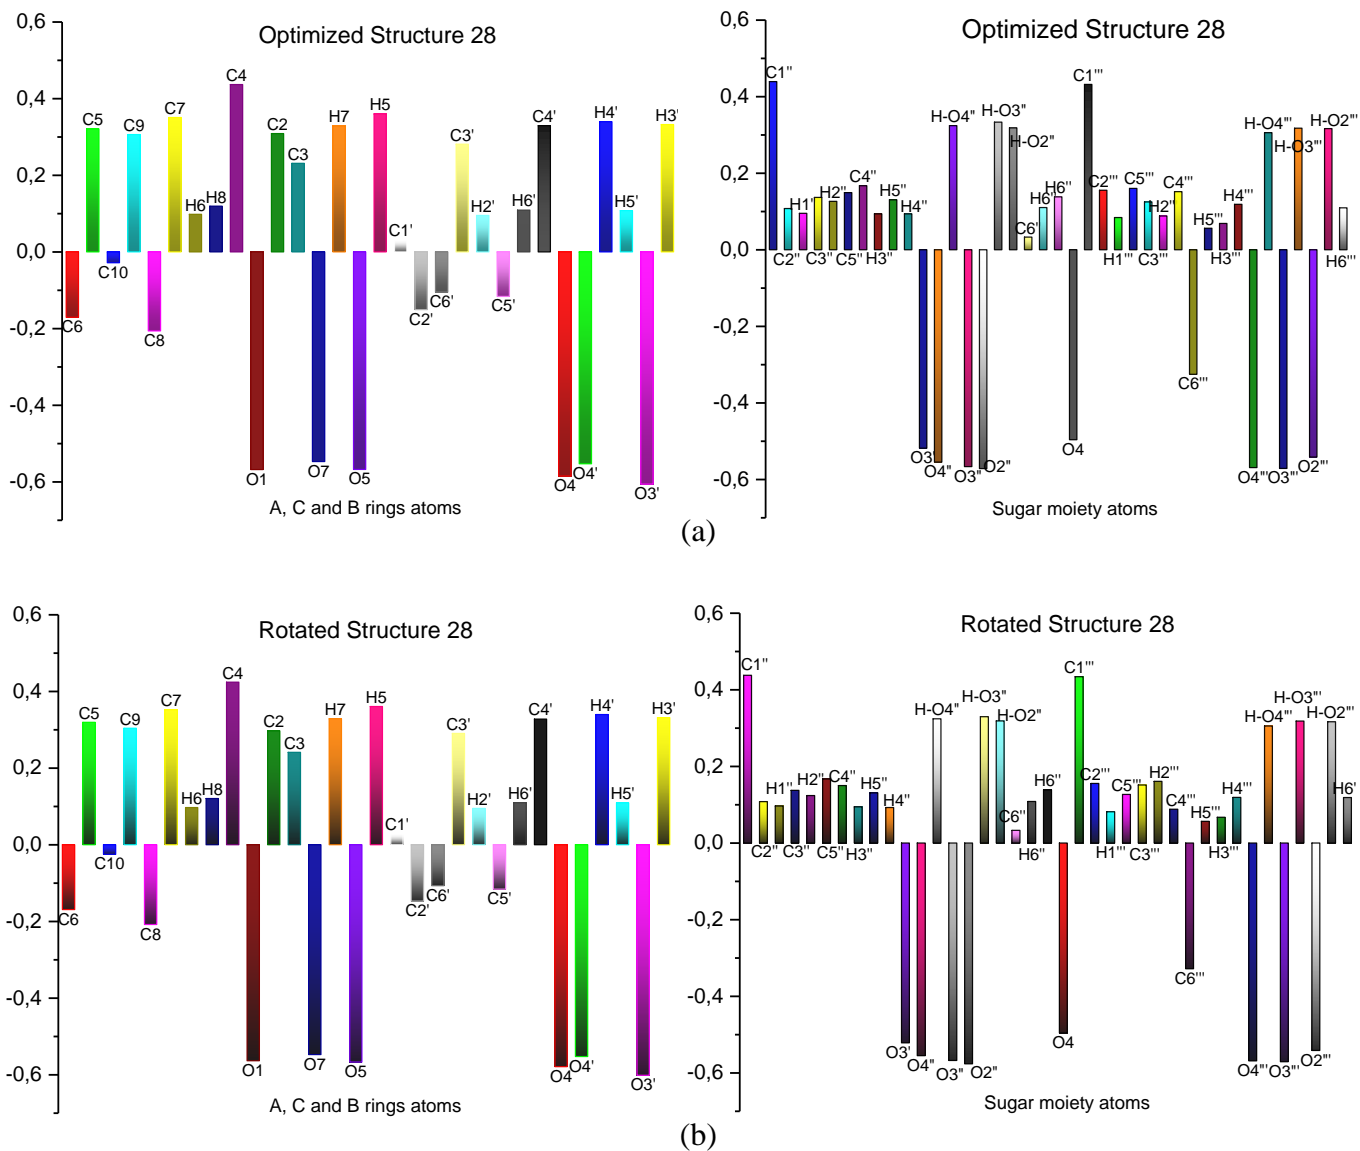

**Figure S4.2** Comparison of B3LYP/6-31G(d,p) Mulliken charges for all atoms of the optimized and rotated structure **28** of the rutin molecule showed in Figure 6.

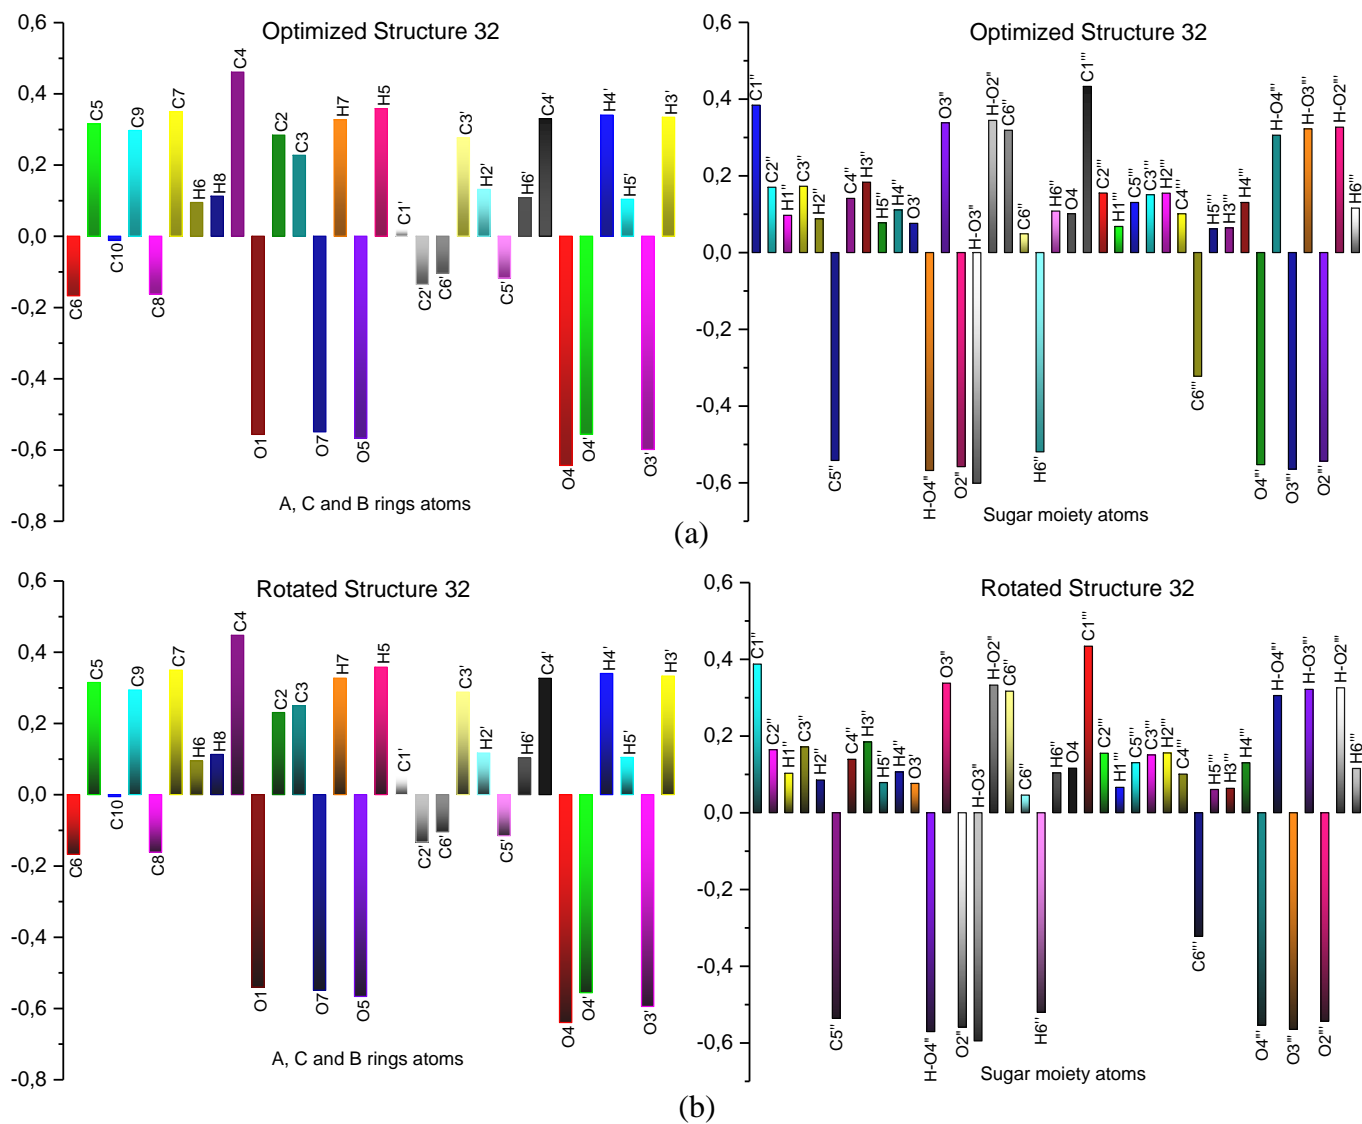

**Figure S4.3** Comparison of B3LYP/6-31G(d,p) Mulliken charges for all atoms of the optimized and rotated structure **32** of the rutin molecule showed in Figure 6.

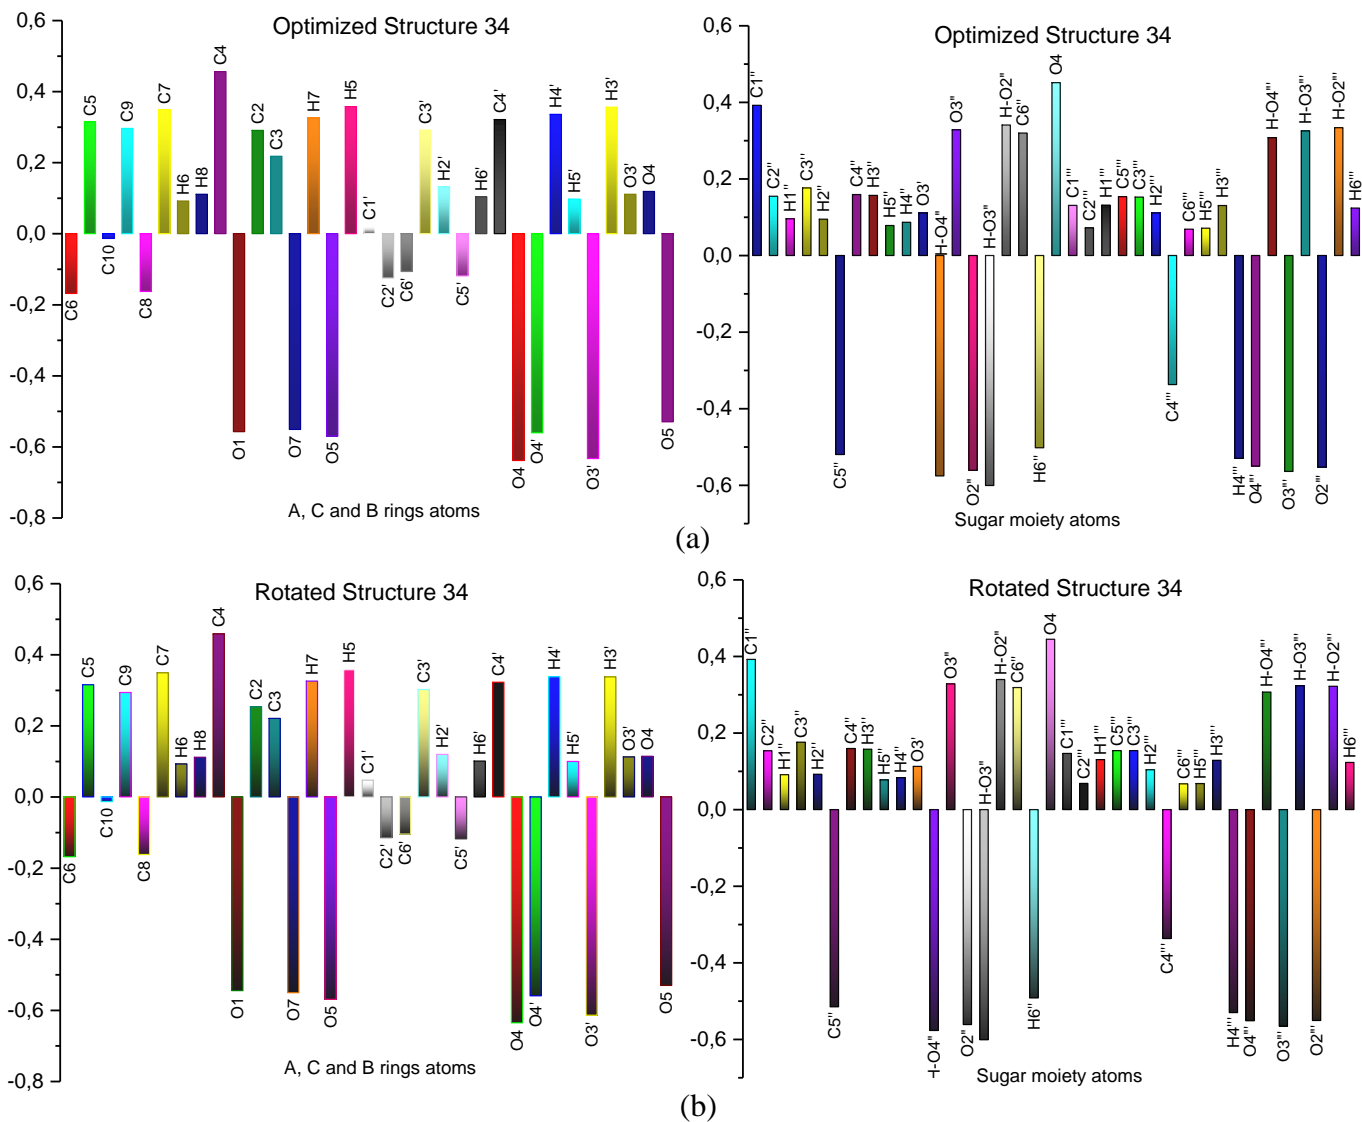

**Figure S4.4** Comparison of B3LYP/6-31G(d,p) Mulliken charges for all atoms of the optimized and rotated structure 34 of the rutin molecule showed in Figure 6.

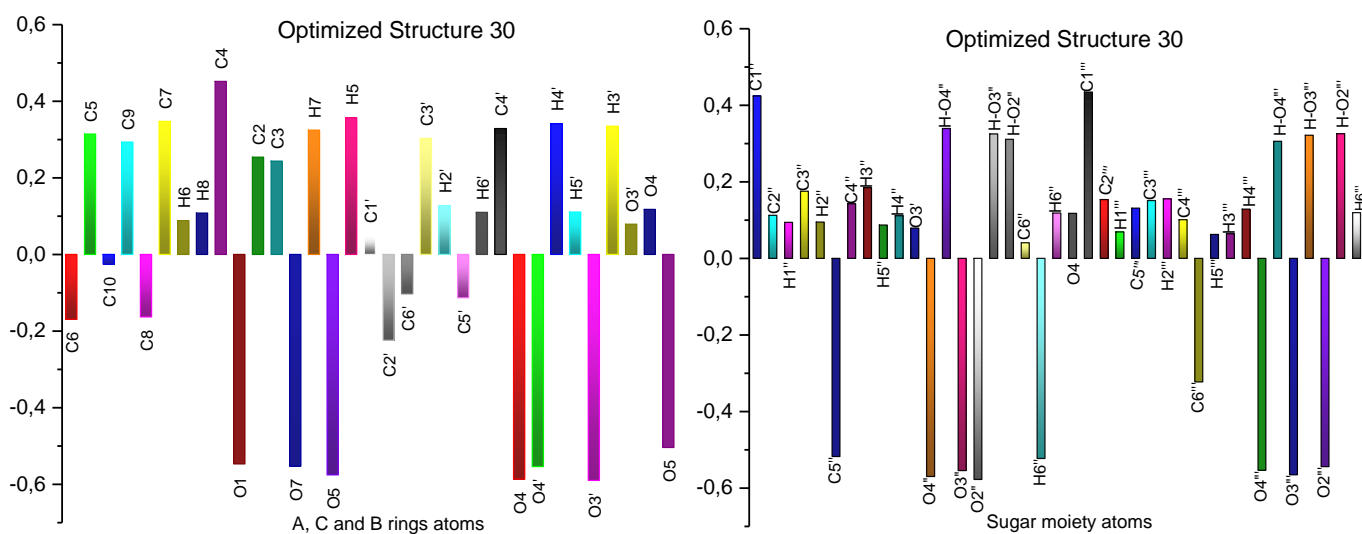

**Figure S4.5** Comparison of B3LYP/6-31G(d,p) Mulliken charges for all atoms of the optimized and rotated structure 30 of the rutin molecule showed in Figure 6.

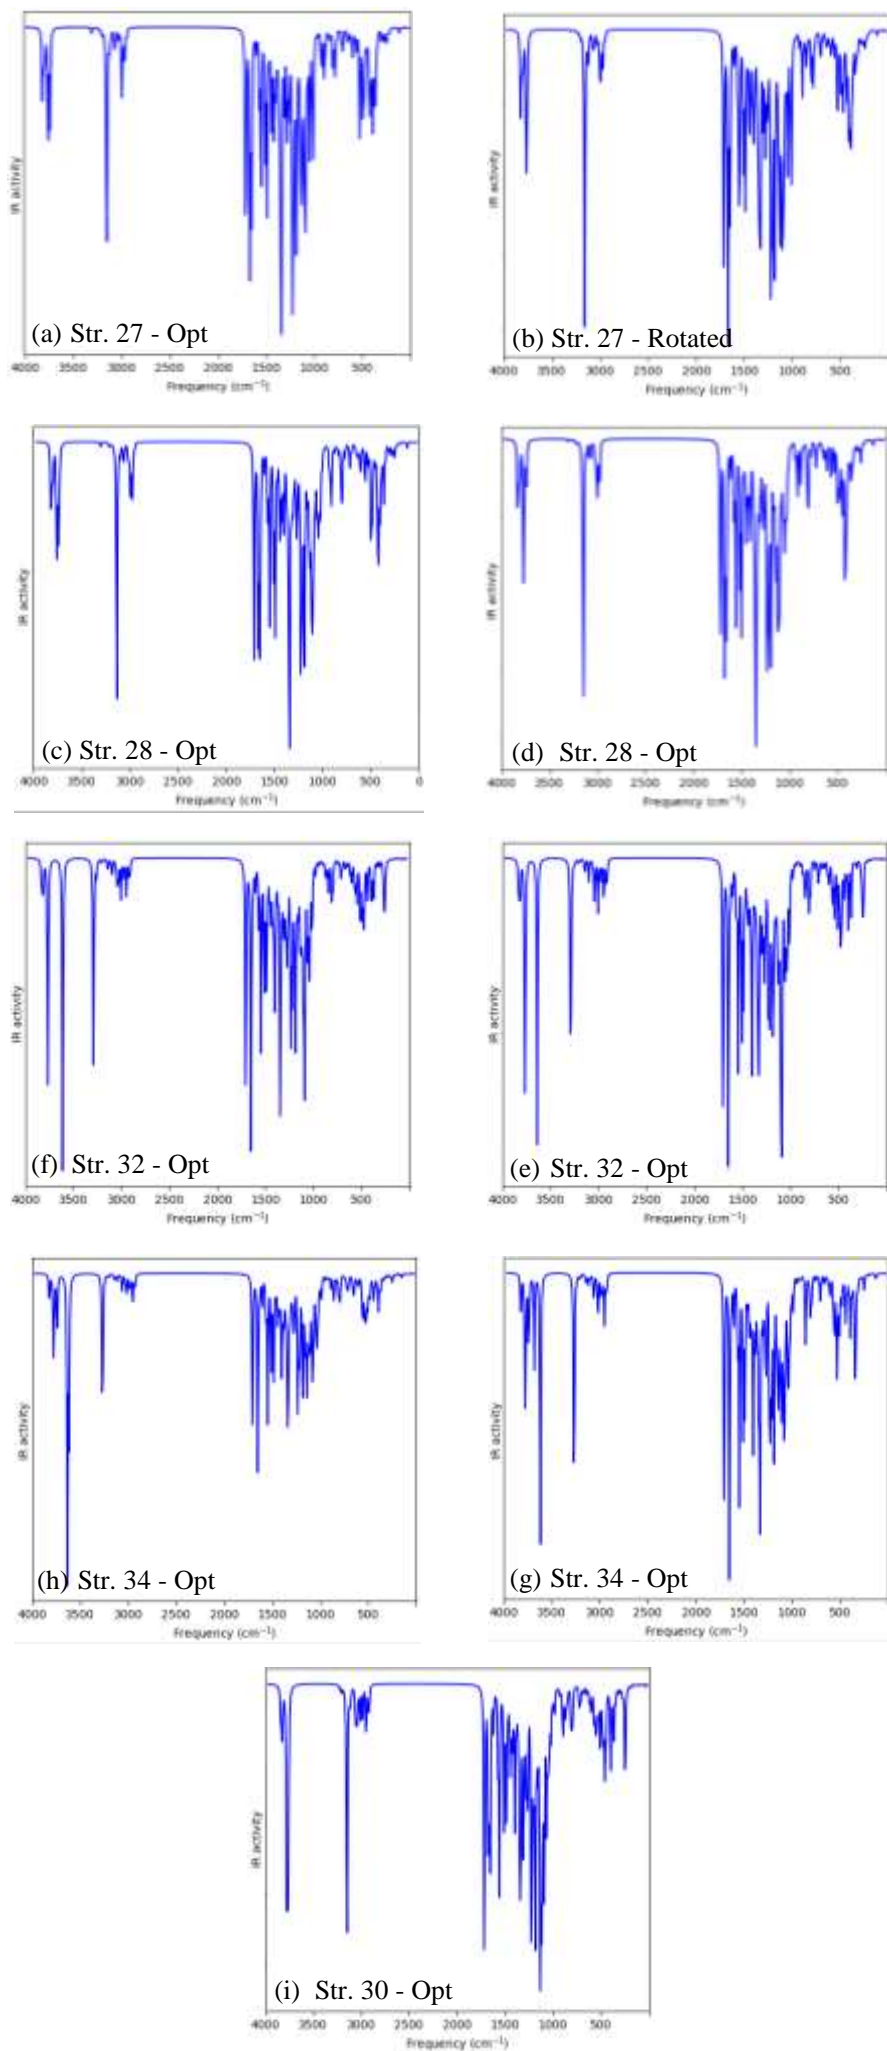

**Figure S5.** Simulation of the IR spectra calculated for rutin structures shown in Figure 6. The main absorption bands are described in Table S2.



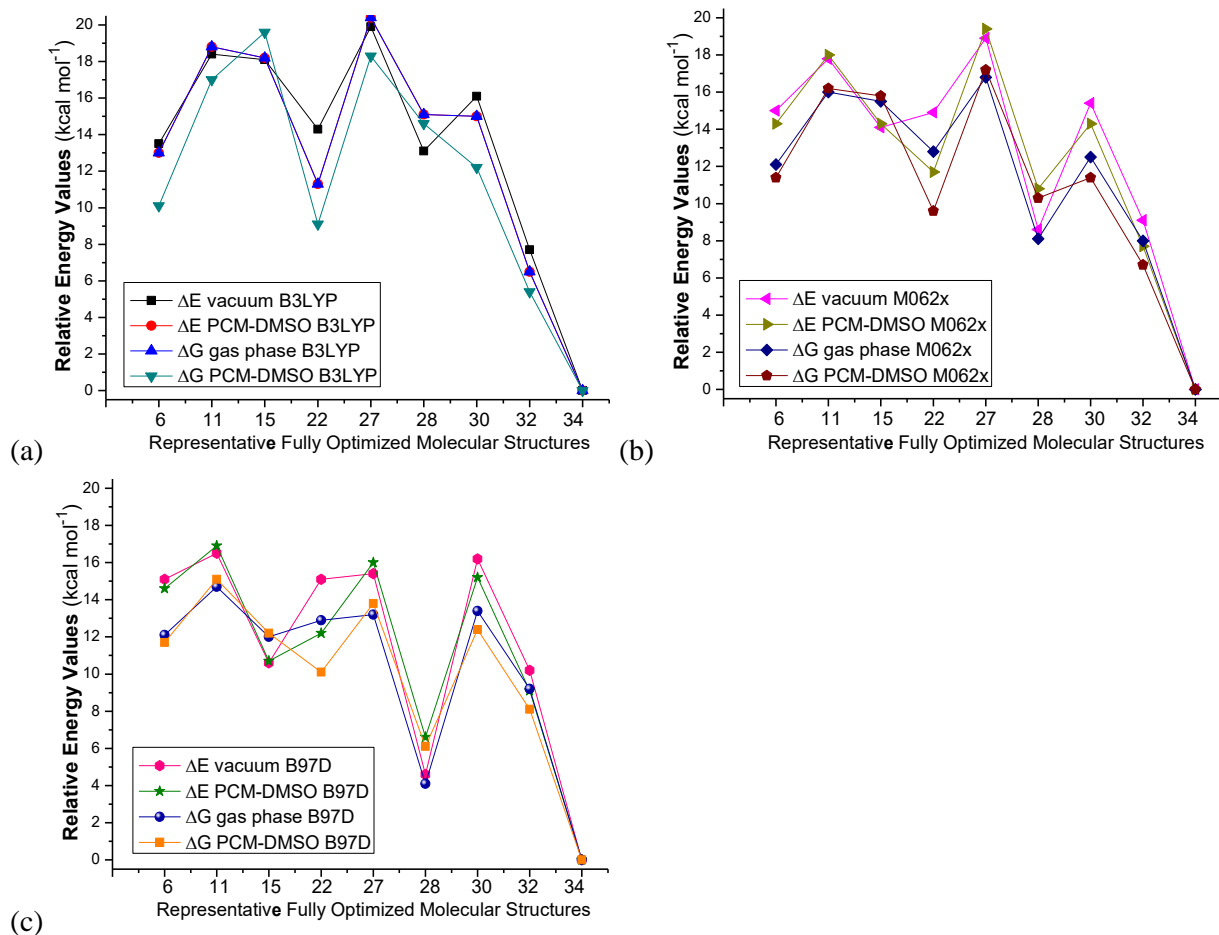

**Figure S6.** DFT/6-31G(d,p) relative energies ( $\Delta E_{\text{rel}}$ ) and Gibbs free energy ( $\Delta G_{\text{rel}}$ ) values (in kcal mol<sup>-1</sup>) for fully optimized rutin structures: **6**, **11**, **15**, **22**, **27**, **28**, **30**, **32** and **34**. Gas phase and PCM-DMSO data are shown.

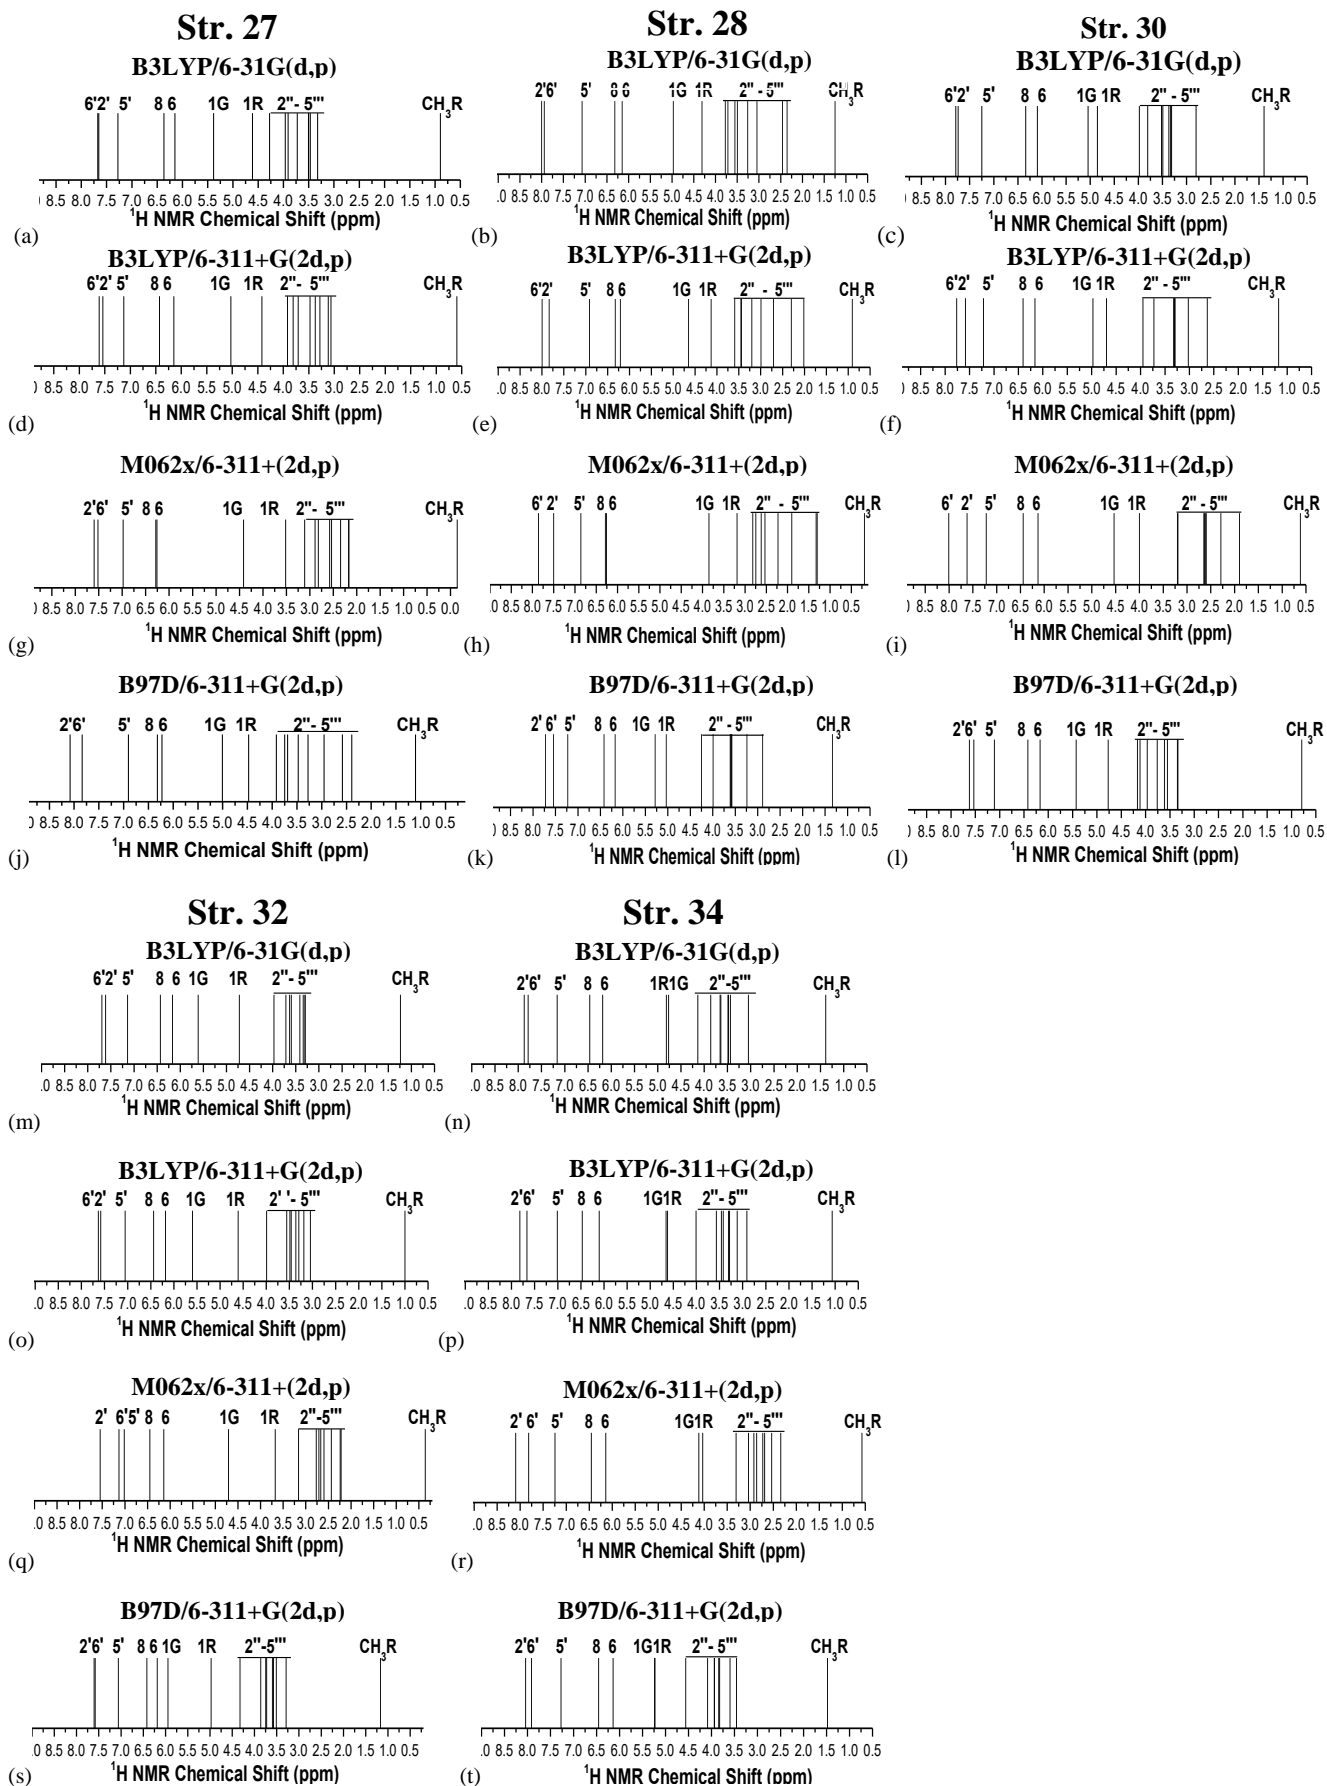

**Figure S7.** Theoretical PCM-DMSO  $^1\text{H}$  NMR spectra for five representative rutin  $\phi_1$ ,  $\phi_2$  rotated structures (see Figure 6) calculated with B3LYP, M062x and B97D functionals using 6-31G(d,p) and 6-311+G(2d,p) basis sets and PCM model to describe DMSO solvent effects. Structure **30** ( $\phi_1 = -146^\circ$ ) did not need to be rotated to describe correctly the H2' and H6' NMR signals.

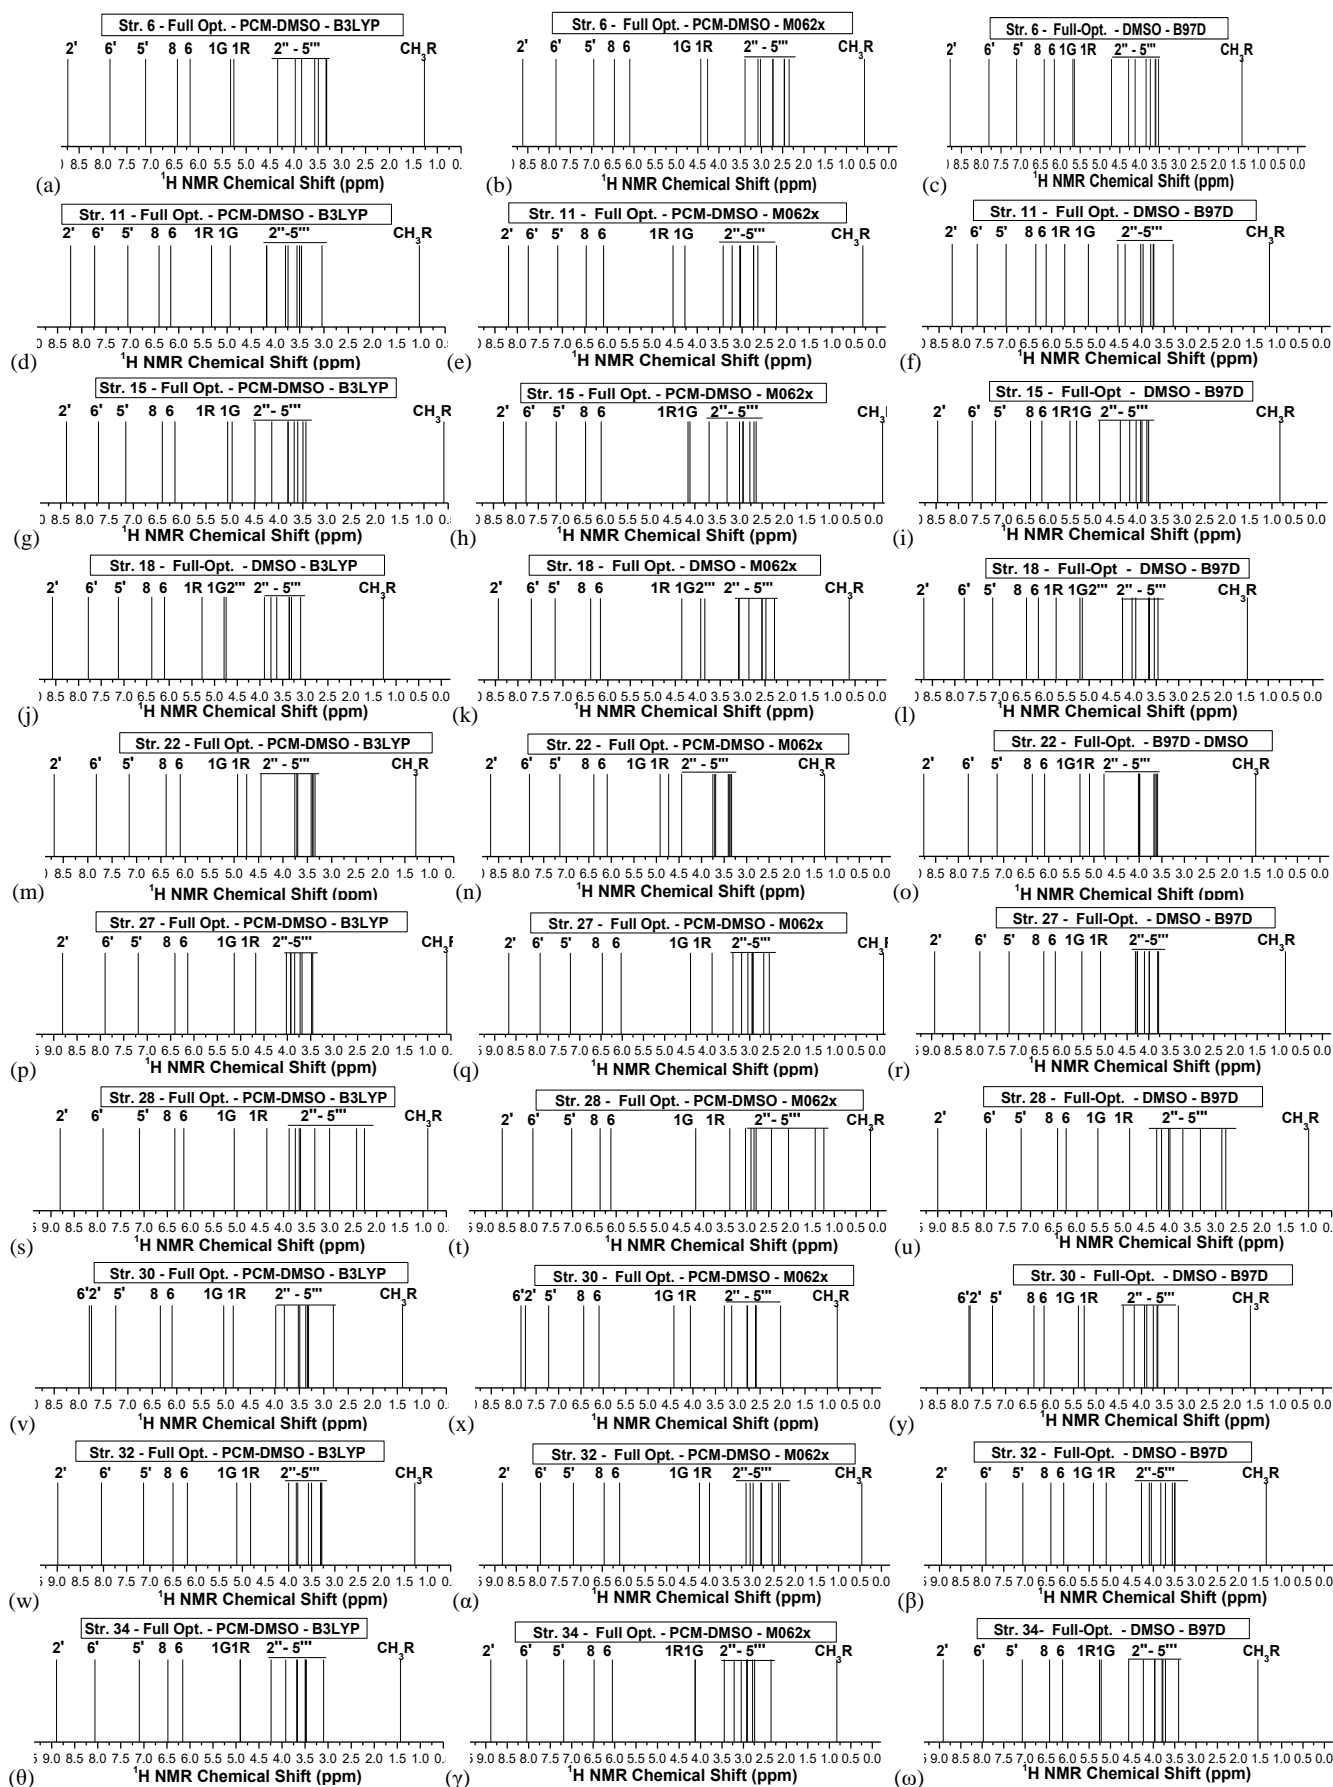

**Figure S8.** Comparison between B3LYP/6-31G(d,p), M062x/6-31G(d,p)/B3LYP/6-31G(d,p) and B97D/6-31G(d,p)/B3LYP/6-31G(d,p) PCM-DMSO <sup>1</sup>H NMR spectra for ten rutin fully optimized structures: **6**, **11**, **15**, **18**, **22**, **27**, **28**, **30**, **32** and **34**.

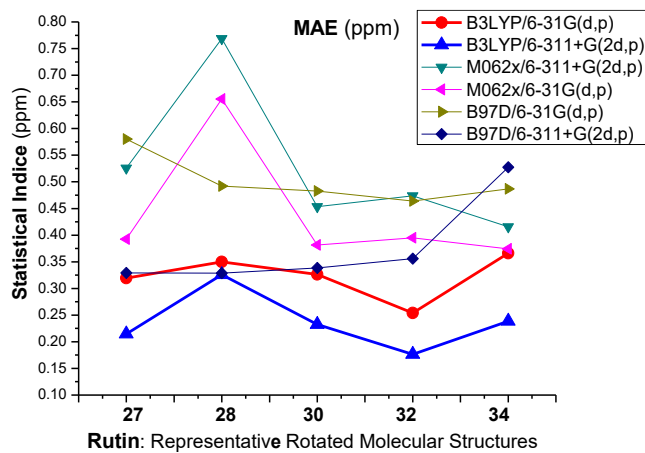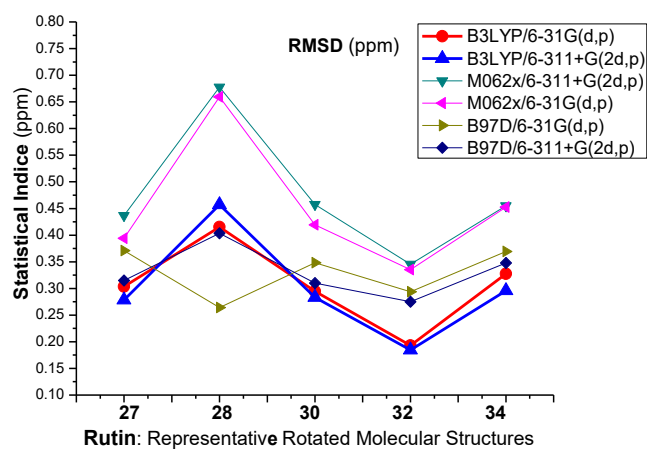

**Figure S9.** Comparison between B3LYP/6-31G(d,p), M062x/6-31G(d,p)//B3LYP/6-31G(d,p) and B97D/6-31G(d,p)//B3LYP/6-31G(d,p) PCM-DMSO  $^1\text{H}$  NMR spectra for ten rutin fully optimized structures: **6**, **11**, **15**, **18**, **22**, **27**, **28**, **30**, **32** and **34**. (Continuation)

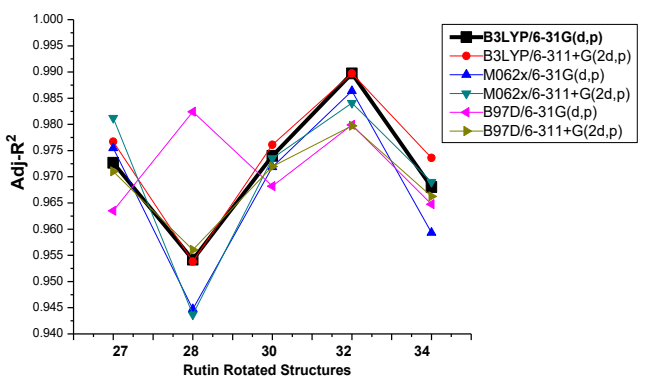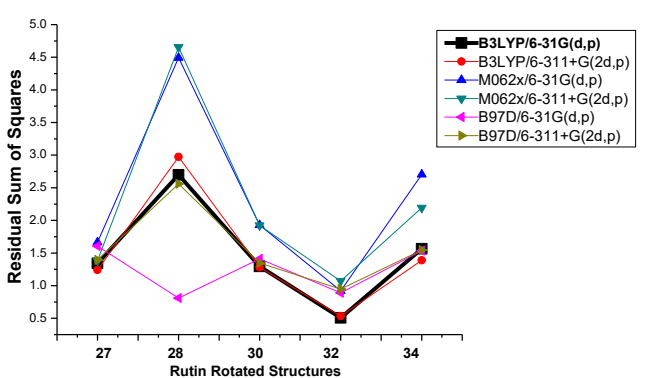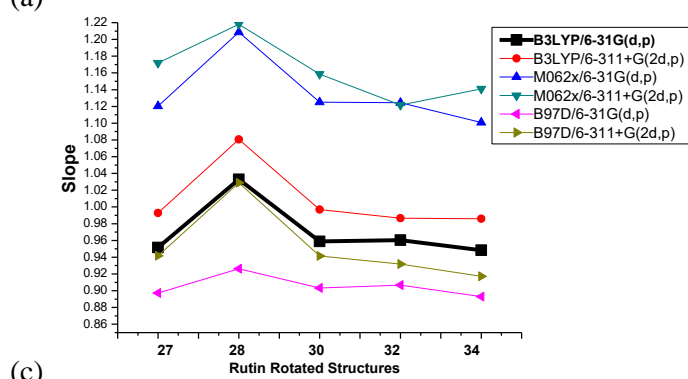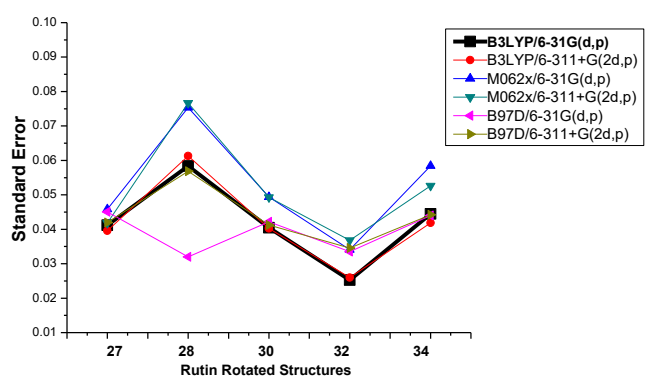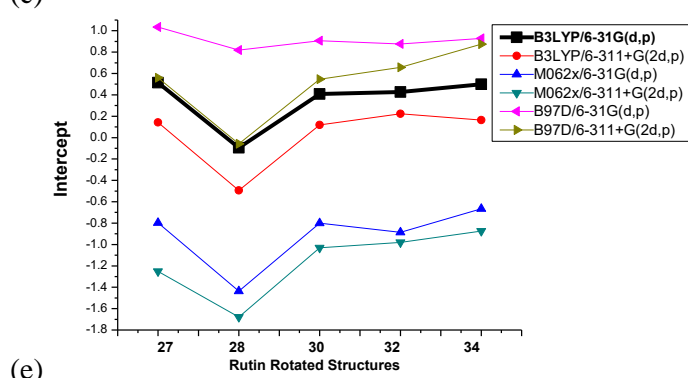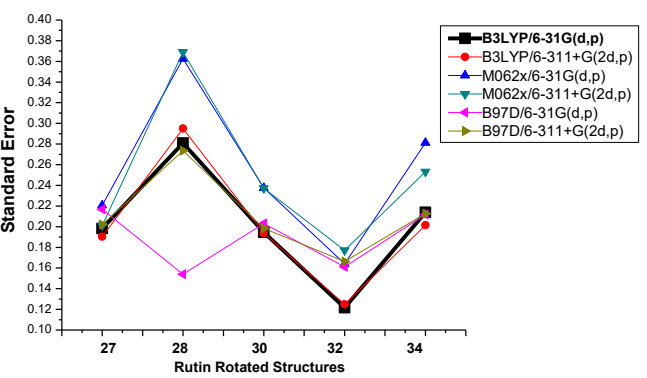

**Figure S10.** DFT-PCM(H<sub>2</sub>O)  $^1\text{H}$  NMR chemical shift regression analysis for five representative rutin rotated structures (**27**, **28**, **30**, **32** and **34**).

**Table S1.** Optimized B3LYP/6-31G(d,p) dihedral angles ( $\phi_1$  to  $\phi_6$ ) and relative energy ( $\Delta E_{\text{rel}}$ , in kcal mol<sup>-1</sup>) for 34 true minima located on the PES for rutin molecule. Minimum energy structures from Figure 1 were used as initial guesses input for full geometry optimization.

| Rutin structures                                                                                                        |                           | Dihedral Angles (°) |          |          |          |          |          | $\Delta E_{\text{rel}}$ <sup>a</sup> (kcal mol <sup>-1</sup> ) |
|-------------------------------------------------------------------------------------------------------------------------|---------------------------|---------------------|----------|----------|----------|----------|----------|----------------------------------------------------------------|
|                                                                                                                         |                           | $\phi_1$            | $\phi_2$ | $\phi_3$ | $\phi_4$ | $\phi_5$ | $\phi_6$ | PCM-Water <sup>b</sup>                                         |
| <b>Geometries optimized using minimum energy input structures from rigid 1D Scan</b>                                    |                           |                     |          |          |          |          |          |                                                                |
| 1                                                                                                                       | $\phi_1$ : M1-axial       | 162.3               | -80.2    | 176.3    | -169.3   | -68.8    | -44.3    | 20.6 (23.2) <sup>a</sup>                                       |
| 2                                                                                                                       | $\phi_1$ : M1-equat       | 162.6               | -80.4    | 176.7    | -168.6   | -70.0    | -42.2    | 17.6 (19.7) <sup>a</sup>                                       |
| 3                                                                                                                       | $\phi_1$ : M2-axial       | 163.0               | -80.7    | 176.6    | -168.8   | -69.1    | -44.8    | 20.5 (23.2) <sup>a</sup>                                       |
| 4                                                                                                                       | $\phi_1$ : M2-equat       | 162.5               | -80.3    | 176.5    | -168.7   | -69.8    | -42.8    | 20.2 (21.7) <sup>a</sup>                                       |
| 5                                                                                                                       | $\phi_2$ : M3-axial       | 160.4               | 124.4    | 134.2    | -169.2   | -68.9    | -43.3    | 16.0 (17.0) <sup>a</sup>                                       |
| 6                                                                                                                       | $\phi_2$ : M3-equat       | 160.8               | 124.8    | 134.3    | -167.5   | -69.8    | -41.5    | 13.1 (13.5) <sup>a</sup>                                       |
| 7                                                                                                                       | $\phi_2$ : M4-axial       | 162.1               | -80.4    | 176.5    | -169.2   | -68.9    | -44.8    | 20.5 (23.2) <sup>a</sup>                                       |
| 8                                                                                                                       | $\phi_2$ : M4-equat       | 162.4               | -80.2    | 176.4    | -168.7   | -69.7    | -42.7    | 17.5 (19.7) <sup>a</sup>                                       |
| 9                                                                                                                       | $\phi_3$ : M5-axial       | 163.0               | -80.2    | 176.2    | -168.7   | -68.9    | -44.0    | 20.5 (23.3) <sup>a</sup>                                       |
| 10                                                                                                                      | $\phi_3$ : M5-equat       | 162.3               | -80.3    | 176.9    | -169.3   | -68.8    | -43.1    | 17.6 (19.7) <sup>a</sup>                                       |
| 11                                                                                                                      | $\phi_3$ : M6-axial       | 154.6               | -97.2    | -64.0    | -170.0   | -68.0    | -46.4    | 18.8 (18.4) <sup>a</sup>                                       |
| 12                                                                                                                      | $\phi_3$ : M6-equat       | 154.7               | -97.3    | -64.1    | -170.6   | -68.4    | -43.1    | 15.8 (14.9) <sup>a</sup>                                       |
| 13                                                                                                                      | $\phi_4$ : M7-axial       | 162.4               | -80.3    | 176.7    | -167.9   | -70.0    | -43.8    | 20.5 (23.2) <sup>a</sup>                                       |
| 14                                                                                                                      | $\phi_4$ : M7-equat       | 162.4               | -80.5    | 176.7    | -169.1   | -69.1    | -42.1    | 17.6 (19.7) <sup>a</sup>                                       |
| 15                                                                                                                      | $\phi_4$ : M8-axial       | 156.0               | -75.5    | 170.7    | 68.9     | -83.3    | -35.7    | 18.2 (18.1) <sup>a</sup>                                       |
| 16                                                                                                                      | $\phi_4$ : M8-equat       | 159.5               | -79.2    | 170.4    | 71.5     | -88.0    | -75.0    | 11.4 (12.1) <sup>a</sup>                                       |
| 17                                                                                                                      | $\phi_4$ : M9-axial       | 161.7               | -79.7    | 175.0    | -72.4    | -102.9   | -25.4    | 18.9 (22.8) <sup>a</sup>                                       |
| 18                                                                                                                      | $\phi_4$ : M9-equat       | 161.7               | -80.4    | 175.4    | -71.1    | -107.0   | -18.2    | 16.1 (19.1) <sup>a</sup>                                       |
| 19                                                                                                                      | $\phi_4$ : M10-axial      | 157.3               | -73.8    | 170.3    | 65.7     | -83.7    | -33.3    | 17.9 (18.0) <sup>a</sup>                                       |
| 20                                                                                                                      | $\phi_4$ : M10-equat      | 158.6               | -74.6    | 170.8    | 62.7     | -83.0    | -45.1    | 12.2 (12.4) <sup>a</sup>                                       |
| 21                                                                                                                      | $\phi_5$ : M11-axial      | 162.2               | -80.8    | 175.3    | 173.3    | 157.3    | -83.6    | 13.8 (17.6) <sup>a</sup>                                       |
| 22                                                                                                                      | $\phi_5$ : M11-quat       | 162.3               | -81.0    | 175.6    | 172.6    | 156.6    | -83.1    | 11.3 (14.4) <sup>a</sup>                                       |
| 23                                                                                                                      | $\phi_5$ : M12-axial      | 162.8               | -81.0    | 176.1    | 162.7    | -165.9   | -59.9    | 19.8 (23.5) <sup>a</sup>                                       |
| 24                                                                                                                      | $\phi_5$ : M12-equat      | 162.8               | -80.6    | 175.8    | 162.9    | -164.4   | -59.3    | 17.0 (20.1) <sup>a</sup>                                       |
| 25                                                                                                                      | $\phi_6$ : M13-axial      | 162.6               | -80.4    | 176.4    | -169.7   | -68.6    | -44.0    | 20.5 (23.2) <sup>a</sup>                                       |
| 26                                                                                                                      | $\phi_6$ : M13-equat      | 162.6               | -80.3    | 176.6    | -169.0   | -69.3    | -42.1    | 17.6 (19.7) <sup>a</sup>                                       |
| 27                                                                                                                      | $\phi_6$ : M14-axial      | 164.5               | -85.1    | 177.1    | 116.2    | -77.8    | -156.6   | 20.3 (19.9) <sup>a</sup>                                       |
| 28                                                                                                                      | $\phi_6$ : M14-equat      | 167.1               | -83.7    | 177.3    | 90.7     | -59.5    | -146.7   | 15.0 (13.1) <sup>a</sup>                                       |
| <b>Geometries optimized as input combination of <math>\phi_1</math>, to <math>\phi_6</math> from structures 1 to 28</b> |                           |                     |          |          |          |          |          |                                                                |
| 29                                                                                                                      | E-ax ( $\phi_5$ : M11-eq) | -145.4              | 106.8    | -86.7    | -170.0   | -100.6   | 177.4    | 17.6 (19.6) <sup>a</sup>                                       |
| 30                                                                                                                      | E-eq ( $\phi_5$ : M11-eq) | -145.5              | 106.7    | -84.3    | -169.9   | -99.7    | 176.8    | 15.0 (16.1) <sup>a</sup>                                       |
| 31                                                                                                                      | G-ax ( $\phi_5$ : M11-eq) | -174.5              | 114.2    | 138.2    | -168.7   | -98.4    | 177.9    | 9.4 (11.2) <sup>a</sup>                                        |
| 32                                                                                                                      | G-eq ( $\phi_5$ : M11-eq) | 174.0               | 119.1    | 137.3    | -168.9   | -99.5    | 176.9    | 6.4 (7.7) <sup>a</sup>                                         |
| 33                                                                                                                      | H-ax ( $\phi_5$ : M11-eq) | -171.6              | 109.1    | 138.9    | -60.9    | -125.5   | -168.8   | 3.0 (3.5) <sup>a</sup>                                         |
| 34                                                                                                                      | H-eq ( $\phi_5$ : M11-eq) | -172.0              | 109.8    | 139.8    | -60.7    | -124.7   | -171.1   | 0 (0) <sup>a</sup>                                             |

<sup>a</sup> The gas phase relative energy values are given in parenthesis.

<sup>b</sup> The corresponding PCM-DMSO relative energies are very similar to PCM-Water values, exhibiting precisely the same energetic trend.

**Table S2.** B3LYP/6-31G(d,p) Mulliken charges (in e) calculated for optimized and rotated ( $\phi_1$  and  $\phi_2$  rotated) preferred structures of rutin in the vacuum.

| Atoms | Structure 27 |         | Structure 28 |         | Structure 32  |               | Structure 34  |               | Structure 30 |
|-------|--------------|---------|--------------|---------|---------------|---------------|---------------|---------------|--------------|
|       | Opt          | Rotated | Opt          | Rotated | Opt           | Rotated       | Opt           | Rotated       | Opt          |
| C6    | -0.1708      | -0.1697 | -0,1706      | -0,1691 | -0.1671       | -0.1673       | -0.1681       | -0.1679       | -0.1696      |
| C5    | 0.3139       | 0.3155  | 0,3211       | 0,3195  | 0.3153        | 0.3147        | 0.3148        | 0.3157        | 0.3144       |
| C10   | -0.0244      | -0.0227 | -0,0282      | -0,0248 | -0.0116       | -0.0053       | -0.0132       | -0.0130       | -0.0254      |
| C9    | 0.2986       | 0.2972  | 0,3062       | 0,3040  | 0.2969        | 0.2940        | 0.2963        | 0.2939        | 0.2933       |
| C8    | -0.1685      | -0.1681 | -0,2063      | -0,2079 | -0.1623       | -0.1614       | -0.1625       | -0.1616       | -0.1633      |
| C7    | 0.3462       | 0.3465  | 0,3508       | 0,3521  | 0.3498        | 0.3499        | 0.3489        | 0.3492        | 0.3473       |
| H6    | 0.0910       | 0.0914  | 0,0981       | 0,0971  | 0.0948        | 0.0949        | 0.0919        | 0.0926        | 0.0882       |
| H8    | 0.1090       | 0.1085  | 0,1194       | 0,1204  | 0.1124        | 0.1131        | 0.1111        | 0.1119        | 0.1081       |
| C4    | 0.4335       | 0.4192  | 0,4368       | 0,4241  | 0.4608        | 0.4475        | 0.4560        | 0.4585        | 0.4519       |
| O1    | -0.5637      | -0.5524 | -0,5681      | -0,5637 | -0.5566       | -0.5403       | -0.557        | -0.5445       | -0.5469      |
| C2    | 0.2994       | 0.2625  | 0,3088       | 0,2969  | 0.2838        | 0.2306        | 0.2906        | 0.2534        | 0.2538       |
| C3    | 0.2265       | 0.2539  | 0,2312       | 0,2413  | 0.2275        | 0.2499        | 0.2180        | 0.2209        | 0.2437       |
| O7    | -0.5523      | -0.5524 | -0,5471      | -0,5472 | -0.5493       | -0.5490       | -0.5510       | -0.5506       | -0.5526      |
| H7    | 0.3256       | 0.3257  | 0,3288       | 0,3286  | 0.3271        | 0.3270        | 0.3258        | 0.3260        | 0.3247       |
| O5    | -0.5722      | -0.5715 | -0,5678      | -0,5670 | -0.5666       | -0.5664       | -0.5696       | -0.5690       | -0.5756      |
| H5    | 0.3583       | 0.3588  | 0,3604       | 0,3606  | 0.3584        | 0.3579        | 0.3576        | 0.3579        | 0.3568       |
| C1'   | 0.0373       | 0.0350  | 0,0326       | 0,0299  | 0.0236        | 0.0556        | 0.0224        | 0.0473        | 0.0508       |
| C2'   | -0.1471      | -0.1548 | -0,1508      | -0,1469 | -0.1354       | -0.1328       | -0.1244       | -0.1146       | -0.2242      |
| C6'   | -0.1076      | -0.1009 | -0,1048      | -0,1071 | -0.1039       | -0.1042       | -0.1064       | -0.1045       | -0.1028      |
| C3'   | 0.2805       | 0.2985  | 0,2813       | 0,2904  | 0.2760        | 0.2878        | 0.2917        | 0.3022        | 0.3029       |
| H2'   | 0.0908       | 0.0982  | 0,0953       | 0,0949  | 0.1316        | 0.1168        | 0.1322        | 0.1195        | 0.1274       |
| C5'   | -0.1163      | -0.1182 | -0,1162      | -0,1159 | -0.1174       | -0.1154       | -0.1191       | -0.1178       | -0.1130      |
| H6'   | 0.1055       | 0.1034  | 0,1090       | 0,1095  | 0.1077        | 0.1030        | 0.1034        | 0.1010        | 0.1099       |
| C4'   | 0.3281       | 0.3272  | 0,3292       | 0,3278  | 0.3300        | 0.3266        | 0.3213        | 0.3230        | 0.3284       |
| O4    | -0.5809      | -0.5783 | -0,5848      | -0,5789 | -0.6435       | -0.6397       | -0.6383       | -0.6354       | -0.5863      |
| O4'   | -0.5546      | -0.5532 | -0,5530      | -0,5524 | -0.5561       | -0.5559       | -0.5605       | -0.5592       | -0.5540      |
| H4'   | 0.3390       | 0.3394  | 0,3397       | 0,3398  | 0.3401        | 0.3404        | 0.3357        | 0.3381        | 0.3410       |
| H5'   | 0.1054       | 0.1093  | 0,1079       | 0,1093  | 0.1035        | 0.1045        | 0.0975        | 0.1000        | 0.1104       |
| O3'   | -0.6073      | -0.5994 | -0,6059      | -0,6014 | -0.5987       | -0.5946       | -0.6330       | -0.6137       | -0.5899      |
| H3'   | 0.3324       | 0.3330  | 0,3322       | 0,3315  | 0.3342        | 0.3330        | 0.3559        | 0.3380        | 0.3349       |
| O3'   | -0.5208      | -0.5295 | -0,5185      | -0,5217 | 0.0761        | 0.0764        | 0.1111        | 0.1127        | 0.0791       |
| O4    | -0.4865      | -0.4861 | -0,4962      | -0,4959 | <b>0.1012</b> | <b>0.1162</b> | <b>0.1188</b> | <b>0.1146</b> | 0.1177       |
| O5    | -0.5086      | -0.5069 | -0,5113      | -0,5111 | -0.5045       | -0.5034       | -0.5297       | -0.5301       | -0.5041      |

**Table S3.** B3LYP/6-31G(d,p) IR stretching frequencies (in  $\text{cm}^{-1}$ ) and intensities (in  $\text{Km mol}^{-1}$ ) in parenthesis for relevant rutin structures.

| <b>Rutin Structures</b> | <b>C-H (C6)</b><br>str. A-ring | <b>C-H (C2')</b><br>str. B-ring | <b>O-H (C5)</b><br>str. A-ring | <b>O-H (C7)</b><br>str. A-ring | <b>O-H (C3')</b><br>str. B-ring | <b>O-H (C4')</b><br>str. B-ring |
|-------------------------|--------------------------------|---------------------------------|--------------------------------|--------------------------------|---------------------------------|---------------------------------|
| <b>Str- 27</b> Full-opt | 3198 (8.2)                     | 3311 (9.1)                      | 3154 (451)                     | 3820 (87)                      | 3742 (156)                      | 3763 (123)                      |
| <b>Str. 27</b> Rotated  | 3199 (8.4)                     | 3292 (2.3)                      | 3156 (435)                     | 3821 (88)                      | 3754 (98)                       | 3764 (118)                      |
| <b>Str- 30</b> Full-opt | 3197 (8.9)                     | 3217 (6.1)                      | 3145 (462)                     | 3821 (84)                      | 3836 (68)                       | 3774 (128)                      |
| <b>Str- 32</b> Full-opt | 3200 (4.9)                     | 3261 (31)                       | 3292 (488)                     | 3820 (97)                      | 3835 (61)                       | 3769 (157)                      |
| <b>Str. 32</b> Rotated  | 3201 (4.8)                     | 3252 (5.4)                      | 3291 (471)                     | 3820 (97)                      | 3835 (61)                       | 3769 (142)                      |

**Table S4.** Rotated dihedral angles ( $\phi_1$  and  $\phi_2$ ) and relative energies ( $\Delta E_{\text{rel}}$ ,  $\Delta H_{\text{rel}}$  and  $\Delta G_{\text{rel}}$ , in kcal mol<sup>-1</sup>) for ten selected B3LYP/6-31G(d,p) rutin structures showing reasonable agreement with experimental <sup>1</sup>H NMR profile. (T = 298.15 K, p = 1 atm)

| Structure | Rutin<br>Torsion angle rotated in 1D scan curve | B3LYP/6-31G(d,p)                 |                       |                                  | M06-2x/6-31G(d,p)           |                                    |                                  | B97D/6-31G(d,p)             |                                    |                                   |                            |                                  |
|-----------|-------------------------------------------------|----------------------------------|-----------------------|----------------------------------|-----------------------------|------------------------------------|----------------------------------|-----------------------------|------------------------------------|-----------------------------------|----------------------------|----------------------------------|
|           |                                                 | Rotated torsion angle values (°) |                       | $\Delta E_{\text{rel}}$          | $\Delta H_{\text{rel}}$     | $\Delta G_{\text{rel}}$            | $\Delta E_{\text{rel}}$          | $\Delta H_{\text{rel}}$     | $\Delta G_{\text{rel}}$            | $\Delta E_{\text{rel}}$           | $\Delta H_{\text{rel}}$    | $\Delta G_{\text{rel}}$          |
|           |                                                 | $\phi_1^{\text{a,e}}$            | $\phi_2^{\text{b,e}}$ | PCM-DMSO                         | PCM-DMSO                    | PCM-DMSO                           | PCM-DMSO                         | PCM-DMSO                    | PCM-DMSO                           | PCM-DMSO                          | PCM-DMSO                   | PCM-DMSO                         |
| <b>6</b>  | $\phi_2$                                        | 138                              | - <sup>c</sup>        | 9.6                              | 9.5                         | 6.3                                | 10.5                             | 10.4                        | 7.1                                | 7.4                               | 7.3                        | 4.0                              |
| <b>11</b> | $\phi_3$                                        | 140                              | - <sup>c</sup>        | 12.9                             | 13.2                        | 11.                                | 10.9                             | 11.2                        | 9.1                                | 10.5                              | 10.8                       | 8.7                              |
| <b>15</b> | $\phi_4$                                        | 140                              | - <sup>c</sup>        | 15.4                             | 15.7                        | 17.1                               | 13.9                             | 14.2                        | 15.6                               | 7.4                               | 7.7                        | 9.1                              |
| <b>18</b> | $\phi_4$                                        | 145                              | - <sup>c</sup>        | 12.5                             | 12.5                        | 12.7                               | 11.5                             | 11.5                        | 11.7                               | 11.8                              | 11.8                       | 12.0                             |
| <b>22</b> | $\phi_5$                                        | 145                              | - <sup>c</sup>        | 7.5                              | 7.2                         | 5.6                                | 7.3                              | 6.9                         | 5.4                                | 8.4                               | 8.4                        | 6.5                              |
| <b>27</b> | $\phi_6$                                        | 145                              | -65                   | 17.0<br>(13.9) <sup>f</sup>      | 17.1<br>(14.0) <sup>f</sup> | 14.8<br>(11.7) <sup>f</sup>        | 12.4<br>(10.4) <sup>f</sup>      | 12.6<br>(10.6) <sup>f</sup> | 10.3<br>(8.3) <sup>f</sup>         | 9.5<br>(6.4) <sup>f</sup>         | 9.7<br>(6.6) <sup>f</sup>  | 7.4<br>(4.2) <sup>f</sup>        |
| <b>28</b> | $\phi_6$                                        | 155                              | -75                   | 11.0<br>(9.7) <sup>f</sup>       | 11.3<br>(10.0) <sup>f</sup> | 12.6<br>(11.3) <sup>f</sup>        | 4.6<br>(3.0) <sup>f</sup>        | 4.8<br>(3.3) <sup>f</sup>   | 6.1<br>(4.6) <sup>f</sup>          | <b>0.6</b><br>(-1.0) <sup>f</sup> | 0.8<br>(-0.7) <sup>f</sup> | <b>2.1</b><br>(0.6) <sup>f</sup> |
| <b>30</b> | Combined $\phi$ 's                              | - <sup>d</sup>                   | - <sup>d</sup>        | 8.3<br>(6.8) <sup>f</sup>        | 8.1<br>(6.6) <sup>f</sup>   | 5.7<br>(4.1) <sup>f</sup>          | 6.1<br>(5.1) <sup>f</sup>        | 5.9<br>(4.9) <sup>f</sup>   | 3.5<br>(2.5) <sup>f</sup>          | 8.0<br>(6.3) <sup>f</sup>         | 7.8<br>(6.1) <sup>f</sup>  | 5.4<br>(3.7) <sup>f</sup>        |
| <b>32</b> | Combined $\phi$ 's                              | <b>-150</b>                      | <b>130</b>            | <b>2.7</b><br>(1.1) <sup>f</sup> | 2.6<br>(0.9) <sup>f</sup>   | <b>-1.0</b><br>(-2.7) <sup>f</sup> | <b>3.2</b><br>(2.3) <sup>f</sup> | 3.1<br>(2.2) <sup>f</sup>   | <b>-0.5</b><br>(-1.4) <sup>f</sup> | 5.6<br>(3.9) <sup>f</sup>         | 5.5<br>(3.8) <sup>f</sup>  | <b>1.9</b><br>(0.2) <sup>f</sup> |
| <b>34</b> | Combined $\phi$ 's                              | -152                             | -                     | 0.0                              | 0.0                         | 0.0                                | 0.0                              | 0.0                         | 0.0                                | 0.0                               | 0.0                        | 0.0                              |

<sup>a</sup> Rotated  $\phi_1$  torsion angle to reach agreement with experimental <sup>1</sup>H NMR spectrum in DMSO solution.

<sup>b</sup> Rotated  $\phi_2$  torsion angle to reach agreement with experimental <sup>1</sup>H NMR spectrum in DMSO solution.

<sup>c</sup>  $\phi_2$  was optimized.

<sup>d</sup>  $\phi_1$  and  $\phi_2$  were optimized.

<sup>e</sup>  $\phi_3$ ,  $\phi_4$ ,  $\phi_5$  and  $\phi_6$  were optimized.

<sup>f</sup> Values calculated with improved 6-311+G(2d,p) basis set are quoted in parenthesis.



**Table S5.** DFT-PCM-DMSO <sup>1</sup>H NMR chemical shifts (in ppm). Regression analysis for rutin molecule.

| Structure | Adjusted R-Squared (Adj. R <sup>2</sup> ) |                         |                     |                         |                 |                         |                    |                         |
|-----------|-------------------------------------------|-------------------------|---------------------|-------------------------|-----------------|-------------------------|--------------------|-------------------------|
|           | Value                                     | Residual Sum of Squares | Value               | Residual Sum of Squares | Value           | Residual Sum of Squares | Value              | Residual Sum of Squares |
|           | M062x/6-31G(d,p)                          |                         | M062x/6-311+G(2d,p) |                         | B97D/6-31G(d,p) |                         | B97D/6-311+G(2d,p) |                         |
| <b>27</b> | 0.975                                     | ±1.664                  | 0.981               | ±1.384                  | 0.963           | ±1.607                  | 0.971              | ±1.395                  |
| <b>28</b> | 0.945                                     | ±4.494                  | 0.944               | ±4.655                  | <b>0.982</b>    | <b>±0.811</b>           | 0.956              | ±2.560                  |
| <b>30</b> | 0.972                                     | ±1.930                  | 0.974               | ±1.923                  | 0.968           | ±1.410                  | 0.972              | ±1.347                  |
| <b>32</b> | <b>0.986</b>                              | <b>±0.920</b>           | <b>0.984</b>        | <b>±1.072</b>           | <b>0.980</b>    | <b>±0.889</b>           | <b>0.980</b>       | <b>±0.946</b>           |
| <b>34</b> | 0.959                                     | ±2.705                  | 0.969               | ±2.192                  | 0.965           | ±1.534                  | 0.966              | ±1.547                  |
| Structure | Regression Slope                          |                         |                     |                         |                 |                         |                    |                         |
|           |                                           | Standard Error          |                     | Standard Error          |                 | Standard Error          |                    | Standard Error          |
|           | M062x/6-31G(d,p)                          |                         | M062x/6-311+G(2d,p) |                         | B97D/6-31G(d,p) |                         | B97D/6-311+G(2d,p) |                         |
| <b>27</b> | 1.120                                     | ±0.046                  | 1.172               | ±0.042                  | 0.897           | ±0.045                  | 0.942              | ±0.042                  |
| <b>28</b> | 1.209                                     | ±0.075                  | 1.218               | ±0.077                  | 0.926           | ±0.032                  | 1.029              | ±0.057                  |
| <b>30</b> | 1.125                                     | ±0.049                  | 1.159               | ±0.049                  | 0.903           | ±0.042                  | 0.942              | ±0.041                  |
| <b>32</b> | 1.125                                     | ±0.034                  | 1.122               | ±0.037                  | 0.907           | ±0.034                  | 0.932              | ±0.035                  |
| <b>34</b> | 1.101                                     | ±0.058                  | 1.141               | ±0.053                  | 0.893           | ±0.044                  | 0.917              | ±0.044                  |
| Structure | Regression Intercept                      |                         |                     |                         |                 |                         |                    |                         |
|           |                                           | Standard Error          |                     | Standard Error          |                 | Standard Error          |                    | Standard Error          |
|           | M062x/6-31G(d,p)                          |                         | M062x/6-311+G(2d,p) |                         | B97D/6-31G(d,p) |                         | B97D/6-311+G(2d,p) |                         |
| <b>27</b> | -0.797                                    | 0.221                   | -1.251              | 0.201                   | 1.035           | 0.217                   | 0.560              | 0.202                   |
| <b>28</b> | -1.437                                    | 0.363                   | -1.680              | 0.369                   | 0.818           | 0.154                   | -0.059             | 0.274                   |
| <b>30</b> | -0.800                                    | 0.238                   | -1.030              | 0.237                   | 0.907           | 0.203                   | 0.547              | 0.198                   |
| <b>32</b> | -0.885                                    | 0.164                   | -0.980              | 0.177                   | 0.876           | 0.161                   | 0.658              | 0.166                   |
| <b>34</b> | -0.666                                    | 0.281                   | -0.874              | 0.253                   | 0.929           | 0.212                   | 0.874              | 0.213                   |
